# Supplementary material
Source: MDPI journal article supplement (https://www.mdpi.com/2227-9717/8/8/919)
Supplement: s1 [file s1]

# Estimating Limits of Detection and Quantification of Ibuprofen by TLC-densitometry at Different Chromatographic Conditions

Josef Jampilek <sup>1,\*</sup>, Malgorzata Dolowy <sup>2</sup>, and Alina Pyka-Pajak <sup>2</sup>

<sup>1</sup> Department of Analytical Chemistry, Faculty of Natural Sciences, Comenius University, Ilkovicova 6, 842 15 Bratislava, Slovakia; josef.jampilek@gmail.com (J.J.)

<sup>2</sup> Department of Analytical Chemistry, Faculty of Pharmaceutical Sciences in Sosnowiec, Medical University of Silesia in Katowice, Jagiellonska 4, 41-200 Sosnowiec, Poland; mdolowy@sum.edu.pl (M.D.), apyka@sum.edu.pl (A.P.P.)

\* Correspondence: josef.jampilek@gmail.com (J.J.)

**Table S1.** Results obtained in RP-TLC system using methanol:water (40:10, v/v) as mobile phase and RP-2F<sub>254</sub> plates.

|                                                                     |       |         |       |
|---------------------------------------------------------------------|-------|---------|-------|
| Amount of ibuprofen spotted onto chromatographic plate [μg/spot]    | 1.00  | 2.00    | 3.00  |
| Measured spot area of ibuprofen [AU]                                | 3501  | 5410    | 7020  |
|                                                                     | 3490  | 5518    | 7000  |
|                                                                     | 3347  | 5398    | 6998  |
| Average value of measured spot area of ibuprofen [AU]               | 3446  | 5442    | 7006  |
| Standard deviation [σ]                                              | 85.91 | 66.09   | 12.16 |
| Coefficient of variation [CV, %]                                    | 2.49  | 1.21    | 0.17  |
| Parameters of calibration curve AU = S·x+b                          |       | Results |       |
| Slope (S)                                                           |       | 1780.0  |       |
| Intercept (b)                                                       |       | 1738.0  |       |
| Correlation coefficient (r)                                         |       | 0.998   |       |
| Standard deviation of slope (σ <sub>a</sub> )                       |       | 124.7   |       |
| Standard deviation of intercept (σ <sub>b</sub> )                   |       | 269.4   |       |
| Residual standard deviation of calibration curve (σ <sub>xy</sub> ) |       | 176.4   |       |

**Table S2.** Results obtained in RP-TLC system using methanol:water (40:10, v/v) as mobile phase and RP-8F<sub>254</sub> plates.

|                                                                  |       |        |       |
|------------------------------------------------------------------|-------|--------|-------|
| Amount of ibuprofen spotted onto chromatographic plate [μg/spot] | 2.00  | 3.00   | 4.00  |
| Measured spot area of ibuprofen [AU]                             | 6116  | 9090   | 1039  |
|                                                                  | 6002  | 8708   | 1075  |
|                                                                  | 6081  | 8890   | 1115  |
| Average value of measured spot area of ibuprofen [AU]            | 6067  | 8896   | 1076  |
| Standard deviation [σ]                                           | 58.40 | 191.07 | 38.01 |
| Coefficient of variation [CV, %]                                 | 0.96  | 2.15   | 3.53  |

| Parameters of calibration curve AU = S·x+b                          | Results |
|---------------------------------------------------------------------|---------|
| Slope (S)                                                           | 2346.5  |
| Intercept (b)                                                       | 1534.8  |
| Correlation coefficient (r)                                         | 0.993   |
| Standard deviation of slope (σ <sub>a</sub> )                       | 278.6   |
| Standard deviation of intercept (σ <sub>b</sub> )                   | 866.1   |
| Residual standard deviation of calibration curve (σ <sub>xy</sub> ) | 393.9   |

**Table S3.** Results obtained in RP-TLC system using methanol:water (40:10, v/v) as mobile phase and RP-18F<sub>254</sub> plates.

|                                                                  |      |       |      |
|------------------------------------------------------------------|------|-------|------|
| Amount of ibuprofen spotted onto chromatographic plate [μg/spot] | 0.20 | 0.30  | 0.40 |
| Measured spot area of ibuprofen [AU]                             | 778  | 1100  | 1714 |
|                                                                  | 788  | 1236  | 1713 |
|                                                                  | 780  | 1160  | 1703 |
| Average value of measured spot area of ibuprofen [AU]            | 782  | 1165  | 1710 |
| Standard deviation [σ]                                           | 5.29 | 68.16 | 6.08 |
| Coefficient of variation [CV, %]                                 | 0.68 | 5.85  | 0.36 |

| Parameters of calibration curve AU = S·x+b                          | Results |
|---------------------------------------------------------------------|---------|
| Slope (S)                                                           | 4640.0  |
| Intercept (b)                                                       | -173.0  |
| Correlation coefficient (r)                                         | 0.995   |
| Standard deviation of slope (σ <sub>a</sub> )                       | 467.7   |
| Standard deviation of intercept (σ <sub>b</sub> )                   | 145.4   |
| Residual standard deviation of calibration curve (σ <sub>xv</sub> ) | 66.1    |

**Table S4.** Results obtained in RP-TLC system using ethanol:water (40:10, v/v) as mobile phase and RP-2F<sub>254</sub> plates.

|                                                                     |       |         |        |
|---------------------------------------------------------------------|-------|---------|--------|
| Amount of ibuprofen spotted onto chromatographic plate [μg/spot]    | 0.40  | 0.50    | 0.60   |
| Measured spot area of ibuprofen [AU]                                | 1718  | 2059    | 2235   |
|                                                                     | 1745  | 2144    | 2398   |
|                                                                     | 1764  | 2176    | 2466   |
| Average value of measured spot area of ibuprofen [AU]               | 1742  | 2126    | 2366   |
| Standard deviation [σ]                                              | 23.11 | 60.47   | 118.71 |
| Coefficient of variation [CV, %]                                    | 1.33  | 2.84    | 5.02   |
| Parameters of calibration curve AU = S·x+b                          |       | Results |        |
| Slope (S)                                                           |       | 3120.0  |        |
| Intercept (b)                                                       |       | 518.0   |        |
| Correlation coefficient (r)                                         |       | 0.991   |        |
| Standard deviation of slope (σ <sub>a</sub> )                       |       | 415.7   |        |
| Standard deviation of intercept (σ <sub>b</sub> )                   |       | 210.6   |        |
| Residual standard deviation of calibration curve (σ <sub>xy</sub> ) |       | 58.8    |        |

**Table S5.** Results obtained in RP-TLC system using ethanol:water (40:10, v/v) as mobile phase and RP-8F<sub>254</sub> plates.

|                                                                     |       |         |       |
|---------------------------------------------------------------------|-------|---------|-------|
| Amount of ibuprofen spotted onto chromatographic plate [μg/spot]    | 0.30  | 0.40    | 0.50  |
| Measured spot area of ibuprofen [AU]                                | 1050  | 1360    | 1600  |
|                                                                     | 999   | 1345    | 1630  |
|                                                                     | 950   | 1368    | 1595  |
| Average value of measured spot area of ibuprofen [AU]               | 1000  | 1358    | 1608  |
| Standard deviation [σ]                                              | 50.00 | 11.68   | 18.93 |
| Coefficient of variation [CV, %]                                    | 5.00  | 0.86    | 1.18  |
| Parameters of calibration curve AU = S·x+b                          |       | Results |       |
| Slope (S)                                                           |       | 3040.0  |       |
| Intercept (b)                                                       |       | 106.0   |       |
| Correlation coefficient (r)                                         |       | 0.995   |       |
| Standard deviation of slope (σ <sub>a</sub> )                       |       | 311.8   |       |
| Standard deviation of intercept (σ <sub>b</sub> )                   |       | 127.3   |       |
| Residual standard deviation of calibration curve (σ <sub>xy</sub> ) |       | 44.1    |       |

**Table S6.** Results obtained in RP-TLC system using ethanol:water (40:10, v/v) as mobile phase and RP-18F<sub>254</sub> plates.

|                                                                     |      |         |       |
|---------------------------------------------------------------------|------|---------|-------|
| Amount of ibuprofen spotted onto chromatographic plate [μg/spot]    | 1.00 | 2.00    | 3.00  |
| Measured spot area of ibuprofen [AU]                                | 3190 | 6100    | 7890  |
|                                                                     | 3188 | 6102    | 7967  |
|                                                                     | 3197 | 6105    | 7936  |
| Average value of measured spot area of ibuprofen [AU]               | 3192 | 6102    | 7931  |
| Standard deviation [σ]                                              | 4.73 | 2.52    | 38.74 |
| Coefficient of variation [CV, %]                                    | 0.15 | 0.04    | 0.49  |
| Parameters of calibration curve AU = S·x+b                          |      | Results |       |
| Slope (S)                                                           |      | 2369.5  |       |
| Intercept (b)                                                       |      | 1002.7  |       |
| Correlation coefficient (r)                                         |      | 0.991   |       |
| Standard deviation of slope (σ <sub>a</sub> )                       |      | 312.0   |       |
| Standard deviation of intercept (σ <sub>b</sub> )                   |      | 674.1   |       |
| Residual standard deviation of calibration curve (σ <sub>xy</sub> ) |      | 441.3   |       |

**Table S7.** Results obtained in RP-TLC system using propan-1-ol:water (40:10, v/v) as mobile phase and RP-2F<sub>254</sub> plates.

|                                                                     |       |         |       |
|---------------------------------------------------------------------|-------|---------|-------|
| Amount of ibuprofen spotted onto chromatographic plate [μg/spot]    | 1.00  | 2.00    | 3.00  |
| Measured spot area of ibuprofen [AU]                                | 1920  | 3010    | 4663  |
|                                                                     | 1903  | 3002    | 4690  |
|                                                                     | 1900  | 2950    | 4638  |
| Average value of measured spot area of ibuprofen [AU]               | 1907  | 2990    | 4663  |
| Standard deviation [σ]                                              | 10.78 | 32.58   | 26.00 |
| Coefficient of variation [CV, %]                                    | 0.56  | 1.09    | 0.56  |
| Parameters of calibration curve AU = S·x+b                          |       | Results |       |
| Slope (S)                                                           |       | 1378.0  |       |
| Intercept (b)                                                       |       | 430.7   |       |
| Correlation coefficient (r)                                         |       | 0.992   |       |
| Standard deviation of slope (σ <sub>a</sub> )                       |       | 170.3   |       |
| Standard deviation of intercept (σ <sub>b</sub> )                   |       | 367.9   |       |
| Residual standard deviation of calibration curve (σ <sub>xy</sub> ) |       | 240.9   |       |

**Table S8.** Results obtained in RP-TLC system using propan-1-ol:water (40:10, v/v) as mobile phase and RP-8F<sub>254</sub> plates.

|                                                                     |       |         |       |
|---------------------------------------------------------------------|-------|---------|-------|
| Amount of ibuprofen spotted onto chromatographic plate [µg/spot]    | 1.00  | 2.00    | 3.00  |
| Measured spot area of ibuprofen [AU]                                | 3892  | 5500    | 7618  |
|                                                                     | 3842  | 5462    | 7598  |
|                                                                     | 3880  | 5490    | 7640  |
| Average value of measured spot area of ibuprofen [AU]               | 3871  | 5484    | 7618  |
| Standard deviation [σ]                                              | 26.10 | 19.70   | 21.00 |
| Coefficient of variation [CV, %]                                    | 0.67  | 0.36    | 0.28  |
| Parameters of calibration curve AU = S·x+b                          |       | Results |       |
| Slope (S)                                                           |       | 1873.5  |       |
| Intercept (b)                                                       |       | 1910.7  |       |
| Correlation coefficient (r)                                         |       | 0.997   |       |
| Standard deviation of slope (σ <sub>a</sub> )                       |       | 150.4   |       |
| Standard deviation of intercept (σ <sub>b</sub> )                   |       | 324.9   |       |
| Residual standard deviation of calibration curve (σ <sub>xv</sub> ) |       | 212.7   |       |

**Table S9.** Results obtained in RP-TLC system using propan-1-ol:water (40:10, v/v) as mobile phase and RP-18F<sub>254</sub> plates.

|                                                                     |       |         |        |
|---------------------------------------------------------------------|-------|---------|--------|
| Amount of ibuprofen spotted onto chromatographic plate [μg/spot]    | 1.00  | 2.00    | 3.00   |
| Measured spot area of ibuprofen [AU]                                | 3608  | 5850    | 8059   |
|                                                                     | 3570  | 5523    | 7793   |
|                                                                     | 3678  | 5405    | 7925   |
| Average value of measured spot area of ibuprofen [AU]               | 3618  | 5464    | 7926   |
| Standard deviation [σ]                                              | 54.80 | 208.00  | 133.00 |
| Coefficient of variation [CV, %]                                    | 1.51  | 3.81    | 1.68   |
| Parameters of calibration curve AU = S·x+b                          |       | Results |        |
| Slope (S)                                                           |       | 2154.0  |        |
| Intercept (b)                                                       |       | 1361.3  |        |
| Correlation coefficient (r)                                         |       | 0.997   |        |
| Standard deviation of slope (σ <sub>a</sub> )                       |       | 177.8   |        |
| Standard deviation of intercept (σ <sub>b</sub> )                   |       | 384.1   |        |
| Residual standard deviation of calibration curve (σ <sub>xv</sub> ) |       | 251.5   |        |

**Table S10.** Results obtained in NP-TLC system using *n*-hexane:ethyl acetate:glacial acetic acid (36:12:2, v/v/v) as mobile phase and silica gel 60F<sub>254</sub> plates (1.05554).

|                                                                     |        |         |       |
|---------------------------------------------------------------------|--------|---------|-------|
| Amount of ibuprofen spotted onto chromatographic plate [μg/spot]    | 1.00   | 2.00    | 3.00  |
| Measured spot area of ibuprofen [AU]                                | 3372   | 5109    | 6642  |
|                                                                     | 3294   | 5400    | 6533  |
|                                                                     | 3173   | 5096    | 6420  |
| Average value of measured spot area of ibuprofen [AU]               | 3280   | 5202    | 6531  |
| Standard deviation [σ]                                              | 100.27 | 171.9   | 111.0 |
| Coefficient of variation [CV, %]                                    | 3.06   | 3.30    | 1.70  |
| Parameters of calibration curve AU = S·x+b                          |        | Results |       |
| Slope (S)                                                           |        | 1625.5  |       |
| Intercept (b)                                                       |        | 1753.3  |       |
| Correlation coefficient (r)                                         |        | 0.994   |       |
| Standard deviation of slope (σ <sub>a</sub> )                       |        | 171.2   |       |
| Standard deviation of intercept (σ <sub>b</sub> )                   |        | 369.8   |       |
| Residual standard deviation of calibration curve (σ <sub>xy</sub> ) |        | 242.1   |       |

**Table S11.** Results obtained in NP-TLC system using *n*-hexane:ethyl acetate:glacial acetic acid (36:12:2, v/v/v) as mobile phase and silica gel 60F<sub>254</sub> plates with concentrating zone (1.05583).

|                                                                  |      |       |      |
|------------------------------------------------------------------|------|-------|------|
| Amount of ibuprofen spotted onto chromatographic plate [μg/spot] | 0.20 | 0.30  | 0.40 |
| Measured spot area of ibuprofen [AU]                             | 1174 | 1401  | 1676 |
|                                                                  | 1168 | 1490  | 1683 |
|                                                                  | 1180 | 1446  | 1679 |
| Average value of measured spot area of ibuprofen [AU]            | 1174 | 1446  | 1679 |
| Standard deviation [σ]                                           | 6.00 | 44.51 | 3.51 |
| Coefficient of variation [CV, %]                                 | 0.51 | 3.08  | 0.21 |

| Parameters of calibration curve AU = S·x+b                          | Results |
|---------------------------------------------------------------------|---------|
| Slope (S)                                                           | 2825.0  |
| Intercept (b)                                                       | 565.5   |
| Correlation coefficient (r)                                         | 0.995   |
| Standard deviation of slope (σ <sub>a</sub> )                       | 285.8   |
| Standard deviation of intercept (σ <sub>b</sub> )                   | 88.8    |
| Residual standard deviation of calibration curve (σ <sub>xy</sub> ) | 40.4    |

**Table S12.** Results obtained in NP-TLC system using *n*-hexane:ethyl acetate:glacial acetic acid (36:12:2, v/v/v) as mobile phase and silica gel 60F<sub>254</sub> plates (1.05570).

|                                                                     |       |         |       |
|---------------------------------------------------------------------|-------|---------|-------|
| Amount of ibuprofen spotted onto chromatographic plate [µg/spot]    | 0.30  | 0.40    | 0.50  |
| Measured spot area of ibuprofen [AU]                                | 1664  | 1930    | 2395  |
|                                                                     | 1750  | 1940    | 2290  |
|                                                                     | 1680  | 1960    | 2295  |
| Average value of measured spot area of ibuprofen [AU]               | 1699  | 1943    | 2326  |
| Standard deviation [σ]                                              | 45.74 | 15.28   | 59.23 |
| Coefficient of variation [CV, %]                                    | 2.69  | 0.78    | 2.55  |
| Parameters of calibration curve AU = S·x+b                          |       | Results |       |
| Slope (S)                                                           |       | 3135.0  |       |
| Intercept (b)                                                       |       | 735.3   |       |
| Correlation coefficient (r)                                         |       | 0.992   |       |
| Standard deviation of slope (σ <sub>a</sub> )                       |       | 401.2   |       |
| Standard deviation of intercept (σ <sub>b</sub> )                   |       | 163.8   |       |
| Residual standard deviation of calibration curve (σ <sub>xv</sub> ) |       | 56.7    |       |

**Table S13.** Results obtained in NP-TLC system by using *n*-hexane:ethyl acetate:glacial acetic acid (36:12:2, v/v/v) as mobile phase and silica gel 60F<sub>254</sub> plates (1.05715).

|                                                                     |       |         |        |
|---------------------------------------------------------------------|-------|---------|--------|
| Amount of ibuprofen spotted onto chromatographic plate [µg/spot]    | 1.00  | 2.00    | 3.00   |
| Measured spot area of ibuprofen [AU]                                | 3346  | 5317    | 6496   |
|                                                                     | 3240  | 5060    | 6335   |
|                                                                     | 3351  | 5200    | 6230   |
| Average value of measured spot area of ibuprofen [AU]               | 3312  | 5192    | 6354   |
| Standard deviation [σ]                                              | 62.70 | 128.70  | 134.00 |
| Coefficient of variation [CV, %]                                    | 1.89  | 2.48    | 2.11   |
| Parameters of calibration curve AU = S·x+b                          |       | Results |        |
| Slope (S)                                                           |       | 1910.7  |        |
| Intercept (b)                                                       |       | 1521.0  |        |
| Correlation coefficient (r)                                         |       | 0.991   |        |
| Standard deviation of slope (σ <sub>a</sub> )                       |       | 207.3   |        |
| Standard deviation of intercept (σ <sub>b</sub> )                   |       | 447.8   |        |
| Residual standard deviation of calibration curve (σ <sub>xy</sub> ) |       | 293.1   |        |

**Table S14.** Results obtained in NP-TLC system using *n*-hexane:ethyl acetate:glacial acetic acid (36:12:2, v/v/v) as mobile phase and Lux silica gel 60F<sub>254</sub> plates (1.05805).

|                                                                     |       |         |       |
|---------------------------------------------------------------------|-------|---------|-------|
| Amount of ibuprofen spotted onto chromatographic plate [µg/spot]    | 1.00  | 2.00    | 3.00  |
| Measured spot area of ibuprofen [AU]                                | 2770  | 4254    | 5023  |
|                                                                     | 2757  | 4268    | 5127  |
|                                                                     | 2806  | 4047    | 5050  |
| Average value of measured spot area of ibuprofen [AU]               | 2778  | 4190    | 5067  |
| Standard deviation [σ]                                              | 25.38 | 123.75  | 53.97 |
| Coefficient of variation [CV, %]                                    | 0.91  | 2.95    | 1.06  |
| Parameters of calibration curve AU = S·x+b                          |       | Results |       |
| Slope (S)                                                           |       | 1144.5  |       |
| Intercept (b)                                                       |       | 1722.7  |       |
| Correlation coefficient (r)                                         |       | 0.991   |       |
| Standard deviation of slope (σ <sub>a</sub> )                       |       | 154.4   |       |
| Standard deviation of intercept (σ <sub>b</sub> )                   |       | 333.6   |       |
| Residual standard deviation of calibration curve (σ <sub>xv</sub> ) |       | 218.4   |       |

**Table S15.** Results obtained in NP-TLC system using toluene:ethyl acetate:glacial acetic acid (27:21:2, v/v/v) as mobile phase and silica gel 60F<sub>254</sub> plates (1.05554).

|                                                                  |      |       |      |
|------------------------------------------------------------------|------|-------|------|
| Amount of ibuprofen spotted onto chromatographic plate [µg/spot] | 0.20 | 0.30  | 0.40 |
| Measured spot area of ibuprofen [AU]                             | 579  | 900   | 1090 |
|                                                                  | 592  | 910   | 1074 |
|                                                                  | 580  | 890   | 1086 |
| Average value of measured spot area of ibuprofen [AU]            | 584  | 900   | 1084 |
| Standard deviation [σ]                                           | 7.23 | 10.00 | 8.33 |
| Coefficient of variation [CV, %]                                 | 1.24 | 1.11  | 0.77 |

| Parameters of calibration curve AU = S·x+b                          | Results |
|---------------------------------------------------------------------|---------|
| Slope (S)                                                           | 2500.0  |
| Intercept (b)                                                       | 106.0   |
| Correlation coefficient (r)                                         | 0.989   |
| Standard deviation of slope (σ <sub>a</sub> )                       | 381.0   |
| Standard deviation of intercept (σ <sub>b</sub> )                   | 118.5   |
| Residual standard deviation of calibration curve (σ <sub>xy</sub> ) | 53.9    |

**Table S16.** Results obtained in NP-TLC system using toluene:ethyl acetate:glacial acetic acid (27:21:2, v/v/v) as mobile phase and silica gel 60F<sub>254</sub> plates with concentrating zone (1.05583).

|                                                                     |       |         |       |
|---------------------------------------------------------------------|-------|---------|-------|
| Amount of ibuprofen spotted onto chromatographic plate [μg/spot]    | 1.00  | 2.00    | 3.00  |
| Measured spot area of ibuprofen [AU]                                | 2149  | 2992    | 4300  |
|                                                                     | 2108  | 2978    | 4367  |
|                                                                     | 2126  | 3164    | 4319  |
| Average value of measured spot area of ibuprofen [AU]               | 2128  | 3045    | 4329  |
| Standard deviation [σ]                                              | 20.55 | 103.60  | 34.53 |
| Coefficient of variation [CV, %]                                    | 0.96  | 3.40    | 0.80  |
| Parameters of calibration curve AU = S·x+b                          |       | Results |       |
| Slope (S)                                                           |       | 1100.5  |       |
| Intercept (b)                                                       |       | 966.3   |       |
| Correlation coefficient (r)                                         |       | 0.995   |       |
| Standard deviation of slope (σ <sub>a</sub> )                       |       | 105.9   |       |
| Standard deviation of intercept (σ <sub>b</sub> )                   |       | 228.9   |       |
| Residual standard deviation of calibration curve (σ <sub>xy</sub> ) |       | 149.8   |       |

**Table S17.** Results obtained in NP-TLC system using toluene:ethyl acetate:glacial acetic acid (27:21:2, v/v/v) as mobile phase and silica gel 60F<sub>254</sub> plates (1.05570).

|                                                                     |       |         |       |
|---------------------------------------------------------------------|-------|---------|-------|
| Amount of ibuprofen spotted onto chromatographic plate [μg/spot]    | 0.20  | 0.30    | 0.40  |
| Measured spot area of ibuprofen [AU]                                | 704   | 1228    | 1495  |
|                                                                     | 760   | 1200    | 1502  |
|                                                                     | 740   | 1183    | 1520  |
| Average value of measured spot area of ibuprofen [AU]               | 736   | 1204    | 1506  |
| Standard deviation [σ]                                              | 28.38 | 22.72   | 12.90 |
| Coefficient of variation [CV, %]                                    | 3.86  | 1.89    | 0.86  |
| Parameters of calibration curve AU = S·x+b                          |       | Results |       |
| Slope (S)                                                           |       | 3850.0  |       |
| Intercept (b)                                                       |       | -6.333  |       |
| Correlation coefficient (r)                                         |       | 0.992   |       |
| Standard deviation of slope (σ <sub>a</sub> )                       |       | 479.2   |       |
| Standard deviation of intercept (σ <sub>b</sub> )                   |       | 149.0   |       |
| Residual standard deviation of calibration curve (σ <sub>xy</sub> ) |       | 67.8    |       |

**Table S18.** Results obtained in NP-TLC system using toluene:ethyl acetate:glacial acetic acid (27:21:2, v/v/v) as mobile phase and silica gel 60F<sub>254</sub> plates (1.05715).

|                                                                     |       |         |       |
|---------------------------------------------------------------------|-------|---------|-------|
| Amount of ibuprofen spotted onto chromatographic plate [μg/spot]    | 0.20  | 0.30    | 0.40  |
| Measured spot area of ibuprofen [AU]                                | 689   | 851     | 1140  |
|                                                                     | 647   | 848     | 1140  |
|                                                                     | 645   | 846     | 1074  |
| Average value of measured spot area of ibuprofen [AU]               | 660   | 848     | 1109  |
| Standard deviation [σ]                                              | 24.85 | 2.52    | 38.10 |
| Coefficient of variation [CV, %]                                    | 3.76  | 0.30    | 3.44  |
| Parameters of calibration curve AU = S·x+b                          |       | Results |       |
| Slope (S)                                                           |       | 2245.0  |       |
| Intercept (b)                                                       |       | 198.8   |       |
| Correlation coefficient (r)                                         |       | 0.996   |       |
| Standard deviation of slope (σ <sub>a</sub> )                       |       | 65.5    |       |
| Standard deviation of intercept (σ <sub>b</sub> )                   |       | 210.7   |       |
| Residual standard deviation of calibration curve (σ <sub>xv</sub> ) |       | 29.8    |       |

**Table S19.** Results obtained in NP-TLC system using toluene:ethyl acetate:glacial acetic acid (27:21:2, v/v/v) as mobile phase and Lux silica gel 60F<sub>254</sub> plates (1.05805).

|                                                                     |       |         |       |
|---------------------------------------------------------------------|-------|---------|-------|
| Amount of ibuprofen spotted onto chromatographic plate [μg/spot]    | 0.30  | 0.40    | 0.50  |
| Measured spot area of ibuprofen [AU]                                | 703   | 940     | 1050  |
|                                                                     | 684   | 890     | 1095  |
|                                                                     | 653   | 924     | 1100  |
| Average value of measured spot area of ibuprofen [AU]               | 680   | 918     | 1081  |
| Standard deviation [σ]                                              | 25.24 | 25.53   | 27.54 |
| Coefficient of variation [CV, %]                                    | 3.71  | 2.78    | 2.55  |
| Parameters of calibration curve AU=S·x+b                            |       | Results |       |
| Slope (S)                                                           |       | 2005.0  |       |
| Intercept (b)                                                       |       | 91.0    |       |
| Correlation coefficient (r)                                         |       | 0.994   |       |
| Standard deviation of slope (σ <sub>a</sub> )                       |       | 216.5   |       |
| Standard deviation of intercept (σ <sub>b</sub> )                   |       | 88.9    |       |
| Residual standard deviation of calibration curve (σ <sub>xy</sub> ) |       | 30.6    |       |
